# Supplementary material for: Molecular design and physical properties of highly functionalized configurationally locked polyenes – an experimental and theoretical study
Source: Royal Society of Chemistry journal article supplement (doi:10.1039/c3tc30568f), 2013-01-01
Supplement: c3tc30568f.pdf [file c3tc30568f.pdf]

SUPPORTING INFORMATION

**Table S1.** Theoretical dipole moments ( $\mu_{\text{tot}}$ ), static polarizabilities ( $\alpha_{ij}$ ) and first hyperpolarizabilities ( $\beta_{ijk}$ ) ( $10^{-30} \text{ cm}^5 \text{ esu}^{-1}$ ) as well as electronic absorption data ( $\lambda$ , nm (f- oscillator strength)) depicted dyes and their forms depending the pH at M06-2X theoretical level

|                    |                                                                                     |                                                                                     |                                                                                       |                                                                                       |                                                                                       |                                                                                       |                                                                                     |                                                                                     |                                                                                       |                                                                                       |                                                                                       |                                                                                       |
|--------------------|-------------------------------------------------------------------------------------|-------------------------------------------------------------------------------------|---------------------------------------------------------------------------------------|---------------------------------------------------------------------------------------|---------------------------------------------------------------------------------------|---------------------------------------------------------------------------------------|-------------------------------------------------------------------------------------|-------------------------------------------------------------------------------------|---------------------------------------------------------------------------------------|---------------------------------------------------------------------------------------|---------------------------------------------------------------------------------------|---------------------------------------------------------------------------------------|
|                    | 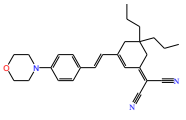   |    |      |    |    |    |  |  |                                                                                       |                                                                                       |                                                                                       |                                                                                       |
|                    | <b>23</b>                                                                           | <b>24</b>                                                                           | <b>25</b>                                                                             | <b>26</b>                                                                             | <b>27</b>                                                                             | <b>28</b>                                                                             | <b>29</b>                                                                           | <b>30</b>                                                                           |                                                                                       |                                                                                       |                                                                                       |                                                                                       |
| $\mu_{\text{tot}}$ | 10.76                                                                               | 9.19                                                                                | 9.9                                                                                   | 25.65                                                                                 | 11.16                                                                                 | 11.56                                                                                 | 10.33                                                                               | 11.51                                                                               | 11.54                                                                                 |                                                                                       |                                                                                       |                                                                                       |
| $\alpha_{xx}$      | -209.56                                                                             | -219.05                                                                             | -191.7                                                                                | -50.07                                                                                | -199.54                                                                               | -263.48                                                                               | -209.24                                                                             | -201.51                                                                             | -197.78                                                                               |                                                                                       |                                                                                       |                                                                                       |
| $\alpha_{yy}$      | -203.10                                                                             | -198.37                                                                             | -200.7                                                                                | -157.07                                                                               | -195.21                                                                               | -230.04                                                                               | -199.68                                                                             | -189.15                                                                             | -189.56                                                                               |                                                                                       |                                                                                       |                                                                                       |
| $\alpha_{zz}$      | -190.38                                                                             | -196.43                                                                             | -193.9                                                                                | -151.88                                                                               | -201.42                                                                               | -205.35                                                                               | -195.31                                                                             | -194.48                                                                             | -192.74                                                                               |                                                                                       |                                                                                       |                                                                                       |
| $\beta$            | <b>822.15</b>                                                                       | <b>750.69</b>                                                                       | <b>455.48</b>                                                                         | <b>1545.07</b>                                                                        | <b>981.56</b>                                                                         | <b>931.18</b>                                                                         | <b>759.10</b>                                                                       | <b>777.90</b>                                                                       | <b>833.24</b>                                                                         |                                                                                       |                                                                                       |                                                                                       |
| $\lambda$ , nm (f) | I 457.42 (0.989), 325.45 (0.587), 300.73 (0.001)                                    | 480.29 (0.866), 335.44 (0.609), 321.81 (0.123)                                      | 460.62 (0.984), 326.46 (0.583), 302.12 (0.003)                                        | 385.14 (1.147), 321.40 (0.003), 301.52 (0.298)                                        | 450.00 (1.084), 323.02 (0.509), 307.76 (0.001)                                        | 508.44 (0.750), 351.03 (0.447), 321.93 (0.138)                                        | 456.66 (0.971), 327.77 (0.537), 314.63 (0.046)                                      | 484.35 (0.980), 414.44 (0.077), 327.02 (0.505)                                      | 569.37 (0.414), 397.05 (0.647), 333.29 (0.486)                                        |                                                                                       |                                                                                       |                                                                                       |
|                    |    |    |      |    |    |    |  |  |                                                                                       |                                                                                       |                                                                                       |                                                                                       |
|                    | <b>31</b>                                                                           | <b>32</b>                                                                           | <b>33</b>                                                                             | <b>34</b>                                                                             | <b>35</b>                                                                             | <b>36</b>                                                                             | <b>37</b>                                                                           | <b>38</b>                                                                           |                                                                                       |                                                                                       |                                                                                       |                                                                                       |
| $\mu_{\text{tot}}$ | 11.58                                                                               | 9.92                                                                                | 9.25                                                                                  | 7.88                                                                                  | 9.82                                                                                  | 9.44                                                                                  | 8.82                                                                                | 10.19                                                                               |                                                                                       |                                                                                       |                                                                                       |                                                                                       |
| $\alpha_{xx}$      | -225.22                                                                             | -190.27                                                                             | 250.09                                                                                | -220.54                                                                               | -240.46                                                                               | -206.82                                                                               | -248.80                                                                             | -209.69                                                                             |                                                                                       |                                                                                       |                                                                                       |                                                                                       |
| $\alpha_{yy}$      | -203.67                                                                             | -189.17                                                                             | -216.39                                                                               | -222.43                                                                               | -218.51                                                                               | -198.69                                                                               | -228.17                                                                             | -211.32                                                                             |                                                                                       |                                                                                       |                                                                                       |                                                                                       |
| $\alpha_{zz}$      | -202.76                                                                             | -187.34                                                                             | -221.24                                                                               | -217.07                                                                               | -188.33                                                                               | -203.11                                                                               | -191.28                                                                             | -214.21                                                                             |                                                                                       |                                                                                       |                                                                                       |                                                                                       |
| $\beta$            | <b>780.15</b>                                                                       | <b>684.01</b>                                                                       | <b>676.76</b>                                                                         | <b>761.87</b>                                                                         | <b>834.56</b>                                                                         | <b>821.30</b>                                                                         | <b>779.270</b>                                                                      | <b>830.65</b>                                                                       |                                                                                       |                                                                                       |                                                                                       |                                                                                       |
| $\lambda$ , nm (f) | I 498.00 (0.686), 426.02 (0.179), 327.62 (0.620)                                    | 460.82 (0.988), 326.52 (0.585), 302.09 (0.003)                                      | 596.20 (0.015), 561.31 (0.341), 428.48 (0.005)                                        | 489.43 (0.665), 452.75 (0.006), 332.76 (0.518)                                        | 476.39 (0.910), 368.29 (0.033), 327.01 (0.583)                                        | 449.28 (0.941), 388.18 (0.093), 334.58 (0.533)                                        | 513.17 (0.637), 443.99 (0.004), 341.31 (0.533)                                      | 453.85 (0.834), 372.96 (0.001), 318.74 (0.627)                                      |                                                                                       |                                                                                       |                                                                                       |                                                                                       |
|                    |   |   |   |   |   |   |  |  |  |  |  |  |
|                    | <b>39</b>                                                                           | <b>40</b>                                                                           | <b>41</b>                                                                             | <b>42</b>                                                                             | <b>43</b>                                                                             | <b>44</b>                                                                             | <b>45</b>                                                                           | <b>46</b>                                                                           | <b>47</b>                                                                             | <b>48</b>                                                                             | <b>49</b>                                                                             | <b>50</b>                                                                             |
| $\mu_{\text{tot}}$ | 11.54                                                                               | 8.35                                                                                | 10.26                                                                                 | 7.64                                                                                  | 10.66                                                                                 | 4.41                                                                                  | 48.5963                                                                             | 45.8764                                                                             | 35.86                                                                                 | 30.55                                                                                 | 30.01                                                                                 | 33.34                                                                                 |
| $\alpha_{xx}$      | -168.33                                                                             | -209.58                                                                             | -227.66                                                                               | -120.36                                                                               | -223.18                                                                               | -202.44                                                                               |                                                                                     |                                                                                     |                                                                                       |                                                                                       |                                                                                       |                                                                                       |
| $\alpha_{yy}$      | -186.78                                                                             | -208.06                                                                             | -225.04                                                                               | -102.35                                                                               | -215.26                                                                               | -199.11                                                                               |                                                                                     |                                                                                     |                                                                                       |                                                                                       |                                                                                       |                                                                                       |
| $\alpha_{zz}$      | -161.98                                                                             | -191.89                                                                             | -220.56                                                                               | -117.41                                                                               | -212.32                                                                               | -205.00                                                                               |                                                                                     |                                                                                     |                                                                                       |                                                                                       |                                                                                       |                                                                                       |
| $\beta$            | <b>976.79</b>                                                                       | <b>649.83</b>                                                                       | <b>905.728</b>                                                                        | <b>420.04</b>                                                                         | <b>847.39</b>                                                                         | <b>655.12</b>                                                                         |                                                                                     |                                                                                     |                                                                                       |                                                                                       |                                                                                       |                                                                                       |
| $\lambda$ , nm (f) | I 471.38 (0.976), 327.53 (0.591), 303.17 (0.001)                                    | 504.10 (0.734), 440.60 (0.003), 341.50 (0.543)                                      | 546.31 (0.246), 466.72 (0.238), 335.17 (0.252)                                        | 405.54 (0.751), 310.65 (0.019), 298.43 (0.023)                                        | 623.24 (0.104), 541.40 (0.272), 375.49 (0.056)                                        | 465.15 (0.003), 418.22 (1.033), 367.22 (0.091)                                        | 362.12 (1.001), 315.22 (0.004), 277.13 (0.474)                                      |                                                                                     |                                                                                       |                                                                                       |                                                                                       |                                                                                       |
|                    |  |  |  |  |  |  |                                                                                     |                                                                                     |                                                                                       |                                                                                       |                                                                                       |                                                                                       |
|                    | <b>45</b>                                                                           | <b>46</b>                                                                           | <b>47</b>                                                                             | <b>48</b>                                                                             | <b>49</b>                                                                             | <b>50</b>                                                                             |                                                                                     |                                                                                     |                                                                                       |                                                                                       |                                                                                       |                                                                                       |
| $\mu_{\text{tot}}$ | 48.5963                                                                             | 45.8764                                                                             | 35.86                                                                                 | 30.55                                                                                 | 30.01                                                                                 | 33.34                                                                                 |                                                                                     |                                                                                     |                                                                                       |                                                                                       |                                                                                       |                                                                                       |

|                    |                                                                                    |                                                                                    |                                                                                     |                                                                                      |                                                                                      |                                                                                      |                                                  |
|--------------------|------------------------------------------------------------------------------------|------------------------------------------------------------------------------------|-------------------------------------------------------------------------------------|--------------------------------------------------------------------------------------|--------------------------------------------------------------------------------------|--------------------------------------------------------------------------------------|--------------------------------------------------|
| $\alpha_{xx}$      | 298.1404                                                                           | 261.6945                                                                           | 164.96                                                                              | 31.40                                                                                | 135.18                                                                               | 73.67                                                                                |                                                  |
| $\alpha_{yy}$      | -250.9422                                                                          | -231.3714                                                                          | -176.70                                                                             | -143.85                                                                              | -159.78                                                                              | -146.33                                                                              |                                                  |
| $\alpha_{zz}$      | -251.3199                                                                          | -263.4928                                                                          | -191.67                                                                             | -156.47                                                                              | -178.26                                                                              | -170.10                                                                              |                                                  |
| $\beta$            |                                                                                    |                                                                                    | <b>3060.14</b>                                                                      | <b>2022.62</b>                                                                       | <b>1945.09</b>                                                                       | <b>2218.24</b>                                                                       |                                                  |
| $\lambda$ , nm (f) | II 1117.76 (0.0291), 669.97 (0.0596), 585.29 (0.0004)                              | 1196.28 (0.0349), 675.75 (0.0578), 610.48 (0.0004)                                 | 610.59 (0.174), 425.22 (0.002), 412.22 (0.001)                                      | 411.16 (0.559), 374.60 (0.022), 342.95 (0.464)                                       | 491.96 (0.075), 425.61 (0.110), 359.14 (0.950)                                       | 601.04 (0.011), 531.31 (0.003), 428.86 (0.118)                                       |                                                  |
|                    | 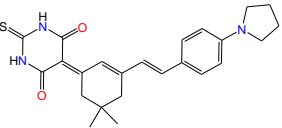  |   |   |   |   |   |                                                  |
|                    | <b>51</b>                                                                          | <b>52</b>                                                                          | <b>53</b>                                                                           | <b>54</b>                                                                            | <b>55</b>                                                                            | <b>56</b>                                                                            |                                                  |
| $\mu_{tot}$        | 32.77                                                                              | 10.62                                                                              | 16.93                                                                               | 12.37                                                                                | 29.20                                                                                | 10.57                                                                                |                                                  |
| $\alpha_{xx}$      | 49.14                                                                              | -267.91                                                                            | 121.45                                                                              | -183.90                                                                              | 80.14                                                                                | -253.99                                                                              |                                                  |
| $\alpha_{yy}$      | -168.39                                                                            | -240.17                                                                            | -168.68                                                                             | -170.97                                                                              | -153.92                                                                              | -198.49                                                                              |                                                  |
| $\alpha_{zz}$      | -180.51                                                                            | -209.58                                                                            | -168.40                                                                             | -164.81                                                                              | -160.12                                                                              | -198.34                                                                              |                                                  |
| $\beta$            | <b>2332.29</b>                                                                     | <b>890.55</b>                                                                      | <b>1220.05</b>                                                                      | <b>1078.11</b>                                                                       | <b>1795.28</b>                                                                       | <b>1882.42</b>                                                                       |                                                  |
| $\lambda$ , nm (f) | I                                                                                  | II 549.59 (0.000), 425.14 (0.573), 385.58 (0.046)                                  | 549.52 (0.521), 385.90 (0.007), 344.76 (0.496)                                      | 847.46 (0.492), 537.53 (0.007), 453.47 (0.883)                                       | 470.07 (0.970), 327.90 (0.664), 304.85 (0.001)                                       | 487.19 (0.000), 413.89 (0.022), 371.05 (0.103)                                       | 521.13 (0.633), 373.99 (1.151), 317.56 (0.259)   |
|                    |   |   |   |   |   |   |                                                  |
|                    | <b>57</b>                                                                          | <b>58</b>                                                                          | <b>59</b>                                                                           | <b>60</b>                                                                            | <b>61</b>                                                                            | <b>62</b>                                                                            |                                                  |
| $\mu_{tot}$        | 36.77                                                                              | 7.37                                                                               | 7.93                                                                                | 7.93                                                                                 | 33.88                                                                                | 30.24                                                                                |                                                  |
| $\alpha_{xx}$      | 107.28                                                                             | -149.65                                                                            | -121.17                                                                             | -121.17                                                                              | 138.79                                                                               | 142.06                                                                               |                                                  |
| $\alpha_{yy}$      | -176.96                                                                            | -167.85                                                                            | -154.93                                                                             | -154.93                                                                              | -147.53                                                                              | -186.12                                                                              |                                                  |
| $\alpha_{zz}$      | -182.52                                                                            | -178.34                                                                            | -160.75                                                                             | -160.75                                                                              | -160.74                                                                              | -231.12                                                                              |                                                  |
| $\beta$            | <b>2729.05</b>                                                                     | <b>539.01</b>                                                                      | <b>544.75</b>                                                                       | <b>544.75</b>                                                                        | <b>2621.30</b>                                                                       | <b>2821.85</b>                                                                       |                                                  |
| $\lambda$ , nm (f) | I                                                                                  | II 388.66 (0.231), 357.25 (0.860), 319.75 (0.208)                                  | 390.28 (0.207), 351.35 (0.985), 309.10 (0.052)                                      | 390.28 (0.207), 351.35 (0.985), 309.10 (0.052)                                       | 551.05 (0.081), 391.71 (0.006), 377.74 (0.228)                                       | 684.39 (0.112), 599.39 (0.267), 491.38 (0.010)                                       | 875.72 (0.011), 815.00 (0.095), 734.29 (0.011)   |
|                    |  |  |  |  |  |  |                                                  |
|                    | <b>64</b>                                                                          | <b>65</b>                                                                          | <b>66</b>                                                                           | <b>67</b>                                                                            | <b>68</b>                                                                            | <b>69</b>                                                                            |                                                  |
| $\mu_{tot}$        | 4.24                                                                               | 31.09                                                                              | 35.42                                                                               | 2.58                                                                                 | 3.15                                                                                 | 14.73                                                                                |                                                  |
| $\alpha_{xx}$      | -146.24                                                                            | 126.49                                                                             | 158.25                                                                              | -150.54                                                                              | 195.83                                                                               | -272.34                                                                              |                                                  |
| $\alpha_{yy}$      | -167.49                                                                            | -165.61                                                                            | -189.64                                                                             | -195.69                                                                              | -190.45                                                                              | -198.18                                                                              |                                                  |
| $\alpha_{zz}$      | -189.75                                                                            | -175.69                                                                            | -198.79                                                                             | -210.33                                                                              | -205.22                                                                              | -192.88                                                                              |                                                  |
| $\beta$            | <b>457.83</b>                                                                      | <b>2307.85</b>                                                                     | <b>2988.98</b>                                                                      | <b>157.04</b>                                                                        | <b>227.72</b>                                                                        | <b>1111.73</b>                                                                       |                                                  |
| $\lambda$ , nm (f) | I 398.89 (1.545), 326.81 (0.142), 312.59 (0.301)                                   | I 392.00 (1.564), 317.87 (0.321), 305.47 (0.034)                                   | 484.06 (0.088), 460.73 (0.015), 429.21 (0.009)                                      | I 464.04 (0.564), 372.84 (1.117), 327.88 (0.020)                                     | I 446.13 (0.906), 380.74 (0.813), 327.79 (0.058)                                     | I 464.48 (1.021), 381.94 (0.043), 337.35 (0.114)                                     | I 414.66 (0.022), 401.96 (1.005), 368.11 (0.040) |
|                    | II 600.92 (0.286), 438.41 (0.003), 435.54 (0.000)                                  | II 595.07 (0.286), 458.62 (0.005), 432.92 (0.001)                                  |                                                                                     | II 775.81 (0.368), 546.58 (0.005), 445.02 (0.001)                                    | II 979.86 (0.073), 599.08 (0.001), 497.61 (0.000)                                    | II 515.47 (0.061), 378.87 (1.177), 346.50 (0.019)                                    |                                                  |
|                    | <b>64</b>                                                                          | <b>65</b>                                                                          | <b>66</b>                                                                           | <b>67</b>                                                                            | <b>68</b>                                                                            | <b>69</b>                                                                            |                                                  |
| $\mu_{tot}$        | 31.09                                                                              | 31.33                                                                              | 35.42                                                                               | 28.56                                                                                | 33.42                                                                                | 34.73                                                                                |                                                  |
| $\alpha_{xx}$      | 126.49                                                                             | 161.92                                                                             | 158.25                                                                              | 152.54                                                                               | 195.83                                                                               | -59.91                                                                               |                                                  |
| $\alpha_{yy}$      | -165.61                                                                            | -171.02                                                                            | -189.64                                                                             | -188.52                                                                              | -190.99                                                                              | -189.85                                                                              |                                                  |
| $\alpha_{zz}$      | -175.69                                                                            | -182.28                                                                            | -198.79                                                                             | -196.11                                                                              | -186.95                                                                              | -181.14                                                                              |                                                  |
| $\beta$            | <b>2307.85</b>                                                                     | <b>2365.81</b>                                                                     | <b>2988.98</b>                                                                      | <b>2171.73</b>                                                                       | <b>2983.72</b>                                                                       | <b>2449.73</b>                                                                       |                                                  |
| $\lambda$ , nm (f) | I 398.89 (1.545), 326.81 (0.142), 312.59 (0.301)                                   | I 392.00 (1.564), 317.87 (0.321), 305.47 (0.034)                                   | 484.06 (0.088), 460.73 (0.015), 429.21 (0.009)                                      | I 464.04 (0.564), 372.84 (1.117), 327.88 (0.020)                                     | I 446.13 (0.906), 380.74 (0.813), 327.79 (0.058)                                     | I 464.48 (1.021), 381.94 (0.043), 337.35 (0.114)                                     | I 414.66 (0.022), 401.96 (1.005), 368.11 (0.040) |
|                    | II 600.92 (0.286), 438.41 (0.003), 435.54 (0.000)                                  | II 595.07 (0.286), 458.62 (0.005), 432.92 (0.001)                                  |                                                                                     | II 775.81 (0.368), 546.58 (0.005), 445.02 (0.001)                                    | II 979.86 (0.073), 599.08 (0.001), 497.61 (0.000)                                    | II 515.47 (0.061), 378.87 (1.177), 346.50 (0.019)                                    |                                                  |
|                    | <b>64</b>                                                                          | <b>65</b>                                                                          | <b>66</b>                                                                           | <b>67</b>                                                                            | <b>68</b>                                                                            | <b>69</b>                                                                            |                                                  |

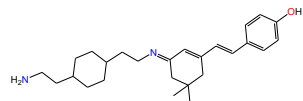

71

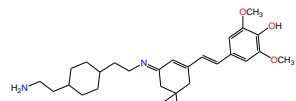

72

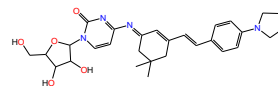

73

|                    | I                                                   | I                                                   | II                                                   |
|--------------------|-----------------------------------------------------|-----------------------------------------------------|------------------------------------------------------|
| $\mu_{\text{tot}}$ | 2.83                                                | 2.47                                                | 41.42                                                |
| $\alpha_{xx}$      | -179.37                                             | -170.66                                             | 291.80                                               |
| $\alpha_{yy}$      | -189.68                                             | -185.71                                             | -184.50                                              |
| $\alpha_{zz}$      | -180.38                                             | -192.23                                             | -211.75                                              |
| $\beta$            | 118.08                                              | 257.48                                              | 3885.48                                              |
| $\lambda$ , nm (f) | I 377.62 (0.027), 341.07 (0.677),<br>316.53 (0.001) | I 360.09 (0.001), 329.94 (1.321),<br>302.74 (0.000) | II 496.31 (0.001), 449.13 (0.024),<br>422.97 (0.015) |
|                    | II -                                                | II -                                                |                                                      |

**Table S2.** The first and second hyperpolarizability tensor matrix components  $\beta_{ijk}$  and  $\gamma_{ijkl}$  of the neutral (**I**) and cationic (**II**) forms of selected CLPs

|                 | <b>MI1</b>  | <b>2</b>    | <b>5</b>    | <b>7</b>    | <b>23</b>   | <b>24</b>   | <b>25</b>   | <b>27</b>   | <b>44</b>   |             |             |             |
|-----------------|-------------|-------------|-------------|-------------|-------------|-------------|-------------|-------------|-------------|-------------|-------------|-------------|
|                 | <b>I</b>    | <b>II</b>   | <b>I</b>    | <b>II</b>   | <b>II</b>   | <b>I</b>    | <b>I</b>    | <b>I</b>    | <b>I</b>    | <b>I</b>    | <b>II</b>   |             |
| $\beta_{xxx}$   | 54.8052     | 610.5152    | -606.4191   | -1393.2530  | 2847.5402   | -2692.8170  | -522.7414   | -405.3738   | -354.5930   | -659.8075   | -220.6072   | -1691.7547  |
| $\beta_{yyy}$   | -21.5501    | -16.9248    | -130.3137   | -125.5594   | -8.3689     | -7.9760     | -165.0629   | -147.2719   | -167.9664   | -176.1626   | 50.0588     | 64.4043     |
| $\beta_{zzz}$   | 3.4473      | 3.7653      | -0.1429     | -1.2846     | -22.0800    | 4.4738      | -2.8261     | 1.9687      | -5.3678     | 101.2507    | -20.6225    | -20.8032    |
| $\beta_{xyy}$   | 118.9248    | 119.7173    | -180.3907   | -160.8700   | 97.2431     | -91.5368    | -193.7804   | -177.2183   | -183.2147   | -208.4198   | -130.1657   | -116.4687   |
| $\beta_{xxy}$   | -164.1111   | -192.6273   | -212.3198   | -230.6835   | -55.0554    | -366.0233   | -167.1907   | -262.2051   | -182.2851   | -198.3136   | 29.8889     | 38.3715     |
| $\beta_{xxz}$   | -48.4661    | 31.5088     | 126.0726    | 70.2549     | -73.8721    | 24.2273     | 168.3371    | 179.7021    | 220.7536    | 83.8460     | 152.8845    | 162.1634    |
| $\beta_{xzz}$   | 5.0666      | 46.9925     | -6.7447     | -69.9830    | 70.7813     | -40.9988    | -12.5975    | -11.3801    | -2.0354     | 37.6839     | -95.8314    | -149.1928   |
| $\beta_{yzz}$   | 4.0405      | 6.7789      | -7.7977     | -5.7229     | -0.3595     | -6.8024     | -7.1956     | -15.1158    | -7.1638     | -0.6130     | 51.6173     | 36.4577     |
| $\beta_{yyz}$   | -2.6004     | -0.3708     | -20.0786    | -12.5830    | -12.4704    | -6.9076     | 5.0631      | -6.9037     | 9.4926      | 6.2083      | 30.0776     | 31.8072     |
| $\beta_{xyz}$   | 13.4836     | 26.6040     | -8.1707     | -27.5089    | -6.5501     | 29.2778     | 37.4630     | -2.6793     | 32.4111     | 29.0889     | -10.5399    | -29.9431    |
| $\gamma_{xxxx}$ | -22016.6398 | -15724.4478 | -31834.6594 | -23085.4094 | -33272.4777 | -17513.5676 | -33089.8670 | -34224.8946 | -31608.4127 | -38606.2263 | -36630.5247 | -21894.4952 |
| $\gamma_{yyyy}$ | -1528.7084  | -1374.7328  | -4358.0070  | -4087.0979  | -2354.9643  | -2185.7835  | -5274.2052  | -4636.4519  | -5256.7752  | -6749.0566  | -4230.7067  | -4012.4805  |
| $\gamma_{zzzz}$ | -438.5484   | -572.2250   | -621.3510   | -766.1068   | -1273.4470  | -793.2580   | -1628.4807  | -1380.7587  | -1480.9135  | -1854.7061  | -1303.1650  | -1349.5514  |
| $\gamma_{xxxy}$ | 827.523     | 405.4522    | -1144.3569  | -710.3463   | -4280.3394  | 484.0059    | -1297.8278  | -1482.5752  | -1405.2950  | -1128.1260  | -964.0127   | -906.2562   |
| $\gamma_{xxxz}$ | 28.7644     | 588.5812    | -504.2731   | -471.1038   | 1935.4706   | -205.6569   | -413.9749   | -111.4538   | 177.4357    | -595.5667   | 1280.3359   | 1166.0742   |
| $\gamma_{yyyx}$ | 165.8909    | 170.5644    | -640.1020   | -585.0825   | -183.4050   | 153.8756    | -614.2226   | -727.6594   | -631.0601   | -872.1555   | 1280.3359   | 198.7661    |
| $\gamma_{yyyz}$ | -19.3573    | -16.5610    | -94.1719    | -94.9570    | 8.7387      | 12.0067     | 7.6016      | -178.2424   | 1.0085      | -71.9704    | -105.7614   | -94.7230    |
| $\gamma_{zzzx}$ | 14.7546     | 5.5371      | 10.2955     | 17.1670     | -37.8308    | -35.3854    | 16.3239     | 78.4941     | 120.8158    | 514.5319    | -31.3773    | -70.1779    |
| $\gamma_{zzzy}$ | 6.3134      | 1.6829      | -1.5740     | 1.0567      | -3.3359     | 7.2994      | 12.6003     | -19.6017    | 12.3069     | -3.5222     | 36.4337     | 38.2781     |
| $\gamma_{xxyy}$ | -3627.4634  | -3342.9741  | -5247.4609  | -4929.3981  | -8656.4326  | -6458.1473  | -5732.1123  | -5777.1342  | -5658.2136  | -6640.7148  | -6222.4440  | -6132.0162  |
| $\gamma_{xxzz}$ | -3206.9052  | -2856.3654  | -4736.4564  | -4103.2765  | -8564.4426  | -6693.3900  | -5334.2218  | -5104.0659  | -5073.0492  | -5667.9859  | -5597.8677  | -4886.6868  |
| $\gamma_{yyzz}$ | -324.4393   | -306.9136   | -757.2377   | -728.8024   | -600.0478   | -503.7060   | -1011.1205  | -932.7078   | -979.4998   | -1411.8474  | -1037.3146  | -980.1495   |
| $\gamma_{xxyz}$ | -65.6461    | 27.8698     | 81.3301     | 224.0040    | 199.5127    | 116.2721    | 64.2192     | -137.1309   | 21.1301     | 160.5276    | -460.8434   | -312.0022   |
| $\gamma_{yyxz}$ | 41.4203     | 59.6334     | -60.2952    | -101.9698   | -53.1406    | -43.4614    | 53.9024     | -116.7058   | 81.5243     | 53.6440     | 160.9147    | 173.4996    |
| $\gamma_{zzxy}$ | -6.9534     | 8.715       | -49.2842    | -52.5506    | -25.7638    | 37.2673     | -52.1163    | -59.9825    | -62.9689    | -95.6225    | 238.9521    | 243.2312    |
|                 | <b>28</b>   | <b>36</b>   | <b>15</b>   | <b>45</b>   | <b>46</b>   | <b>19</b>   | <b>6</b>    | <b>47</b>   | <b>48</b>   | <b>50</b>   | <b>21</b>   | <b>67</b>   |
|                 | <b>I</b>    | <b>I</b>    | <b>II</b>   | <b>I</b>    |
| $\beta_{xxx}$   | -417.5403   | -661.8924   | -5573.8837  | -5647.5960  | -4975.0683  | -5143.6295  | -6370.2878  | -2884.3242  | -1897.7623  | -2075.4465  | 3787.8489   | -165.5295   |
| $\beta_{yyy}$   | -167.6391   | -127.5810   | 129.4475    | 122.1247    | 173.4532    | 93.3795     | 8.8585      | -10.8539    | -7.9517     | -43.0530    | -36.2571    | -10.3948    |
| $\beta_{zzz}$   | 6.1895      | 6.6831      | -80.9435    | -76.5707    | -64.9466    | 19.8726     | -12.4688    | 5.2060      | 5.7798      | 3.0622      | 12.1212     | 3.5926      |
| $\beta_{xyy}$   | -185.1198   | -144.8026   | -103.8172   | -251.3199   | -61.1699    | -139.3190   | -500.7378   | -93.3337    | -82.3144    | -19.1820    | 223.0094    | 87.6663     |
| $\beta_{xxy}$   | -226.6137   | -150.1064   | 1131.3505   | 1097.8970   | 867.3061    | 1125.6378   | -665.3174   | -277.7148   | 5.3610      | -428.2889   | -907.4184   | 8.3642      |
| $\beta_{xxz}$   | 192.0227    | 98.2846     | 10.5728     | 132.7237    | 33.0681     | 7.4101      | 196.8042    | -46.2561    | -20.8440    | -157.0485   | 33.3848     | -127.1832   |
| $\beta_{xzz}$   | -9.6294     | 39.5221     | -169.2110   | -176.3662   | -139.9354   | -148.5101   | -134.6094   | -68.1249    | -42.5042    | -64.2926    | 99.3123     | -28.6906    |
| $\beta_{yzz}$   | -13.6486    | -2.0276     | 23.3776     | 14.4993     | -0.5306     | 13.9580     | 18.1399     | -2.7888     | -5.3340     | -8.5924     | -8.5785     | 1.3825      |
| $\beta_{yyz}$   | -11.2438    | -4.9929     | 60.9210     | 124.1029    | 16.9815     | -7.0434     | 96.7461     | -11.4139    | 4.4391      | -17.1797    | 2.8288      | 10.0068     |
| $\beta_{xyz}$   | -6.2682     | -6.4295     | -162.9971   | -67.8813    | -168.5815   | 46.0460     | -154.2109   | 40.1115     | -2.3162     | 5.4592      | 45.7960     | 36.5264     |
| $\gamma_{xxxx}$ | -32341.1408 | -31431.5857 | 31.6689     | 1209.7869   | -1505.1650  | -8308.3755  | 553.7978    | -13592.1005 | -17276.4630 | -15075.0902 | -14709.5827 | -51226.8796 |
| $\gamma_{yyyy}$ | -4861.6470  | -5033.4413  | -9733.9648  | -11370.4418 | -7709.5114  | -4777.7565  | -12524.3513 | -2037.4861  | -1868.4967  | -1851.5501  | -7583.8707  | -2609.5031  |

|                 |             |             |             |             |             |             |             |            |            |            |            |            |
|-----------------|-------------|-------------|-------------|-------------|-------------|-------------|-------------|------------|------------|------------|------------|------------|
| $\gamma_{zzzz}$ | -1401.4075  | -1378.0339  | -2635.6570  | -2664.1197  | -2315.5959  | -3149.3649  | -1816.6543  | -786.0118  | -619.6679  | -684.0594  | -1486.1237 | -760.9730  |
| $\gamma_{xxxY}$ | -1481.0943  | -2004.3544  | -8488.2029  | -11507.6480 | -5929.2100  | -3848.8867  | 10679.2099  | 1109.5188  | 1824.0951  | -1490.5356 | -3658.8010 | 377.4022   |
| $\gamma_{xxxZ}$ | 272.2245    | 874.8771    | -597.5672   | -722.6006   | -1023.4229  | 5755.2523   | 4441.0689   | -1439.1997 | -548.3824  | -1754.9972 | 987.2501   | -1896.9647 |
| $\gamma_{YYXX}$ | -760.5627   | -712.9163   | -81.1265    | -699.4031   | 583.9978    | 114.3336    | 1135.0889   | 95.0344    | 102.4299   | -155.4824  | -256.1990  | -130.9225  |
| $\gamma_{YYYZ}$ | 27.8827     | -80.9170    | -330.0415   | 55.5503     | -271.1889   | -16.0358    | -95.7855    | 39.4740    | -11.3876   | 59.2606    | -39.9238   | -29.4291   |
| $\gamma_{zzzX}$ | 118.5764    | 124.6902    | -121.0996   | -132.6802   | -157.5596   | 396.5098    | 65.2280     | -79.6148   | -12.2193   | -60.8437   | 48.3189    | 42.9175    |
| $\gamma_{zzzY}$ | -7.5727     | -13.8240    | -69.7377    | -24.9486    | -79.1078    | 26.3721     | -18.5080    | -2.3172    | -16.8031   | -3.3082    | 10.3435    | -17.4894   |
| $\gamma_{XXYY}$ | -5512.9760  | -5787.1009  | -9962.9121  | -11093.2153 | -9339.9805  | -10363.3684 | -12578.1357 | -7516.6497 | -4656.0185 | -4837.7891 | -8368.3352 | -8901.7588 |
| $\gamma_{XXZZ}$ | -4759.0966  | -5188.9083  | -11326.6296 | -11738.3894 | -10227.7024 | -11070.6698 | -11940.4503 | -7882.1388 | -4403.2330 | -5331.7769 | -7594.4513 | -9756.0918 |
| $\gamma_{YYZZ}$ | -934.3012   | -1013.9682  | -2164.9218  | -2499.0680  | -1770.0948  | -1251.1401  | -2203.6849  | -475.5539  | -414.3434  | -451.0523  | -1540.3604 | -559.5206  |
| $\gamma_{XXYZ}$ | 10.2703     | -136.8999   | -320.5768   | 535.4014    | -537.5433   | -137.6485   | -1460.2455  | 240.5123   | 3.0273     | -46.0451   | -124.0322  | -116.0684  |
| $\gamma_{YYXZ}$ | 77.5498     | -4.0123     | 201.8777    | 686.9506    | -8.6074     | 157.4473    | 932.5090    | -84.6653   | 22.7609    | -135.8039  | 83.7917    | -15.3772   |
| $\gamma_{ZZXY}$ | -59.8805    | -124.8861   | -46.4417    | -160.2926   | -21.3750    | -94.7387    | 213.9848    | 38.1265    | 15.4650    | -16.1302   | -84.8234   | -11.5633   |
|                 | <b>71</b>   | <b>57</b>   | <b>72</b>   | <b>61</b>   | <b>9</b>    | <b>73</b>   | <b>17</b>   |            |            |            |            |            |
|                 | <b>I</b>    | <b>II</b>   | <b>I</b>    | <b>II</b>   | <b>II</b>   | <b>II</b>   | <b>II</b>   |            |            |            |            |            |
| $\beta_{xxx}$   | 41.0031     | -3099.8141  | -120.8949   | -2457.2148  | -3100.1232  | -3630.5003  | -5906.5702  |            |            |            |            |            |
| $\beta_{YYY}$   | -31.6055    | 15.4417     | -0.6854     | 19.5536     | 26.1410     | -65.5234    | -148.0418   |            |            |            |            |            |
| $\beta_{zzz}$   | -4.0059     | 34.2781     | 11.7134     | 8.3688      | 17.7926     | -61.4698    | -29.4259    |            |            |            |            |            |
| $\beta_{XYY}$   | -9.8554     | -161.4473   | -146.8657   | -108.3508   | -137.9749   | -17.7553    | -187.0866   |            |            |            |            |            |
| $\beta_{XXY}$   | 133.5494    | -303.7441   | 93.6441     | 39.8090     | 64.6182     | -778.6783   | -729.2995   |            |            |            |            |            |
| $\beta_{XXZ}$   | -37.3657    | 291.2873    | 44.4346     | -47.4977    | -45.3391    | -488.5023   | -30.9100    |            |            |            |            |            |
| $\beta_{XZZ}$   | 11.3605     | -53.0768    | 30.9343     | -54.5021    | -16.1726    | -100.5623   | -143.6357   |            |            |            |            |            |
| $\beta_{YZZ}$   | -1.3907     | -0.0657     | -11.3882    | 9.7892      | -7.5114     | -5.1939     | 14.7066     |            |            |            |            |            |
| $\beta_{YYZ}$   | -3.6234     | 8.2709      | 3.4978      | -1.9229     | 9.7005      | -17.3158    | 38.3448     |            |            |            |            |            |
| $\beta_{XYZ}$   | 52.9372     | -8.1783     | 84.5172     | 11.2396     | 1.4080      | 86.4103     | -78.1040    |            |            |            |            |            |
| $\gamma_{xxxx}$ | -14101.9263 | -17999.1350 | -45148.9267 | -4572.8058  | -31376.6385 | -3575.0324  | -1636.2118  |            |            |            |            |            |
| $\gamma_{YYYY}$ | -8305.3461  | -2306.4367  | -2440.086   | -2413.5276  | -3347.5301  | -2399.3011  | -10090.1017 |            |            |            |            |            |
| $\gamma_{zzzz}$ | -788.4627   | -890.6357   | -915.4168   | -525.7496   | -1496.1230  | -1396.4550  | -2124.4106  |            |            |            |            |            |
| $\gamma_{xxxY}$ | 600.9865    | 3333.5423   | 4459.8921   | -2689.9689  | 1769.3357   | 3047.3541   | 5750.0872   |            |            |            |            |            |
| $\gamma_{xxxZ}$ | -469.5581   | 226.8476    | 503.2033    | 280.9261    | 1218.0570   | 1196.5376   | 2990.5075   |            |            |            |            |            |
| $\gamma_{YYXX}$ | -302.6290   | 407.4961    | 49.6781     | -213.2160   | 470.3646    | -196.9320   | -466.7542   |            |            |            |            |            |
| $\gamma_{YYYZ}$ | -25.1290    | 13.6092     | -31.4137    | -23.1572    | 2.2450      | 54.3539     | 254.4327    |            |            |            |            |            |
| $\gamma_{zzzX}$ | 1.6243      | 97.8635     | 60.1512     | 22.6827     | -5.7082     | -123.2605   | 113.3853    |            |            |            |            |            |
| $\gamma_{zzzY}$ | -2.3689     | -2.9568     | -8.0670     | 10.6218     | 35.5044     | 42.0194     | 94.6860     |            |            |            |            |            |
| $\gamma_{XXYY}$ | -3924.3060  | -7892.4932  | -8503.867   | -4783.9668  | -8881.7237  | -8270.6295  | -10730.4493 |            |            |            |            |            |
| $\gamma_{XXZZ}$ | -2475.5813  | -7873.7138  | -8138.8052  | -4501.8010  | -8929.1155  | -9803.1819  | -10897.9630 |            |            |            |            |            |
| $\gamma_{YYZZ}$ | -1452.9623  | -542.7258   | -601.4417   | -501.6368   | -775.3512   | -656.5400   | -2135.3823  |            |            |            |            |            |
| $\gamma_{XXYZ}$ | 191.3883    | 85.7887     | -507.5071   | -58.3612    | 286.9495    | 614.3745    | 128.8387    |            |            |            |            |            |
| $\gamma_{YYXZ}$ | 35.1281     | -59.8102    | -58.2441    | -51.9944    | -177.9922   | -49.1723    | 445.9233    |            |            |            |            |            |
| $\gamma_{ZZXY}$ | 4.4116      | 153.9106    | 41.5964     | -27.2386    | 79.9433     | 60.0349     | 85.2829     |            |            |            |            |            |

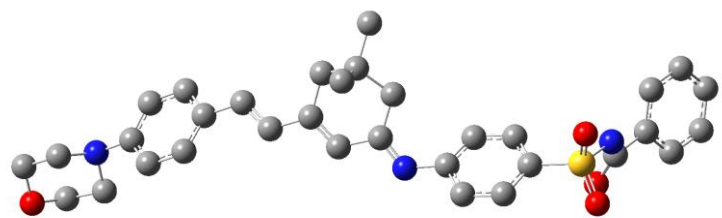

19

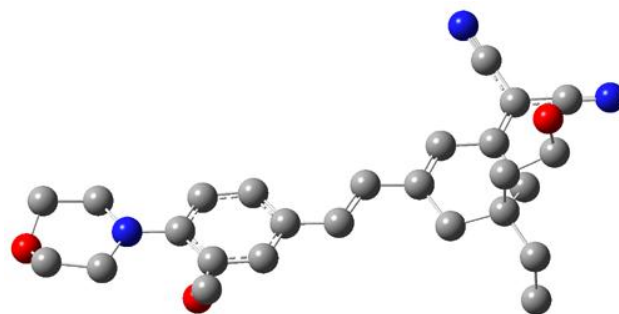

24

**Scheme S1.** Optimized molecular geometries of selected CLPs; Hydrogens are omitted.

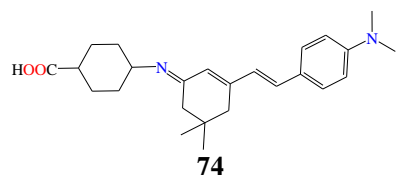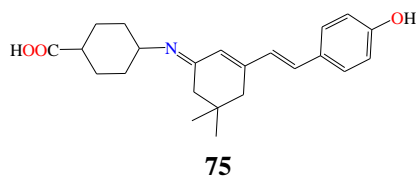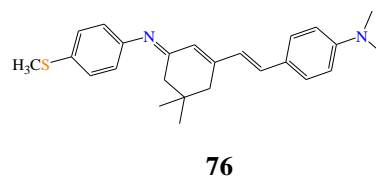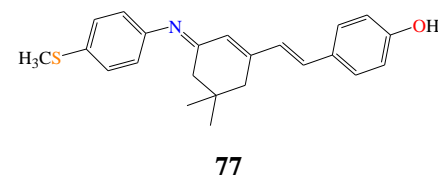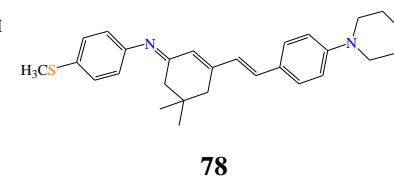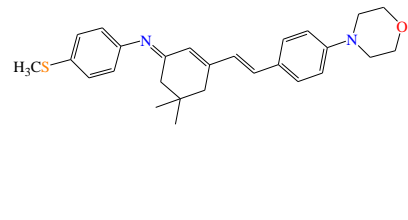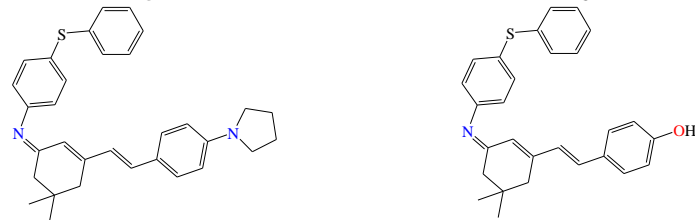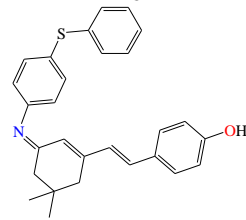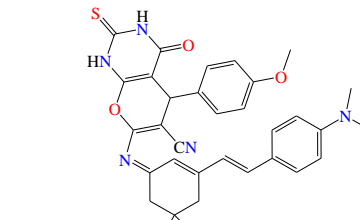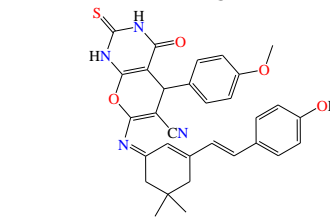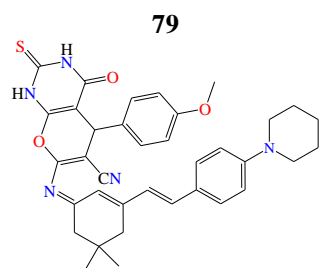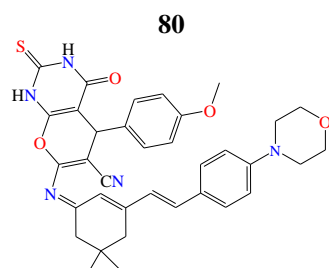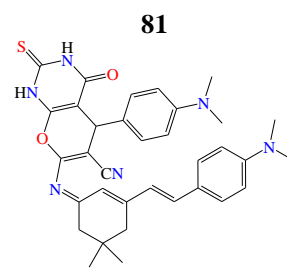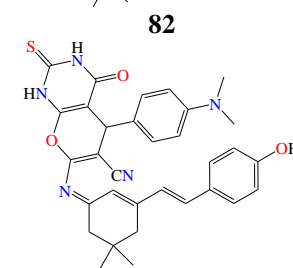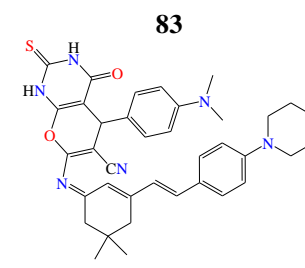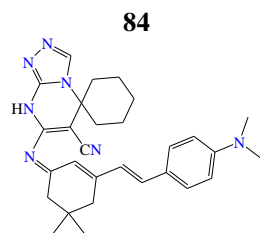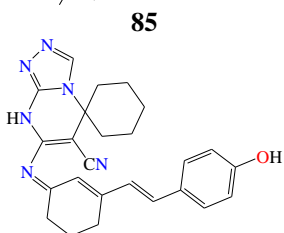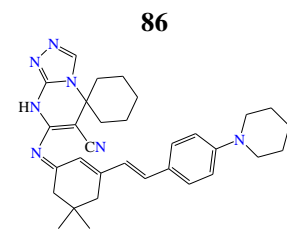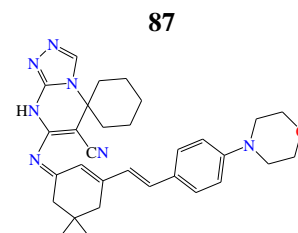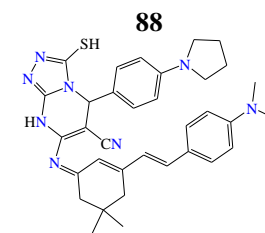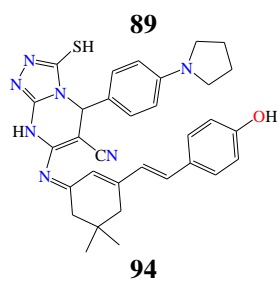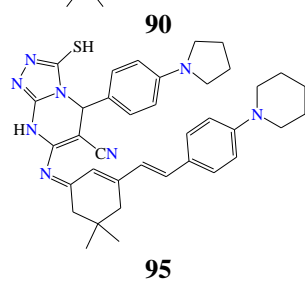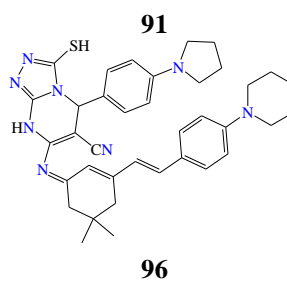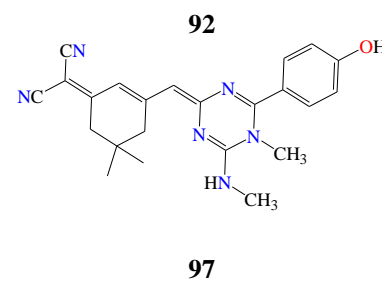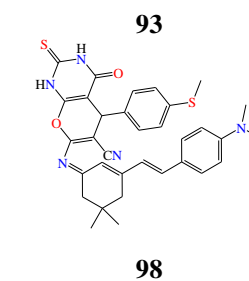

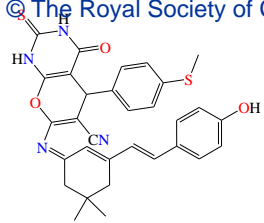

99

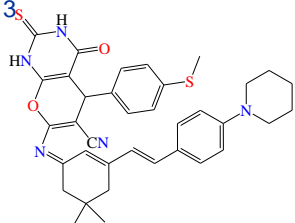

100

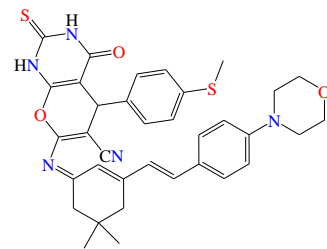

101

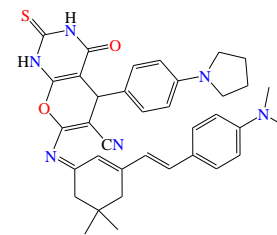

102

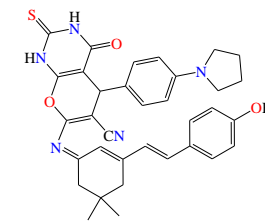

103

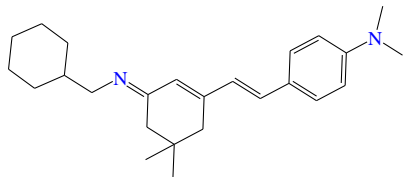

104

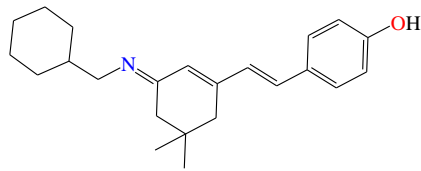

105

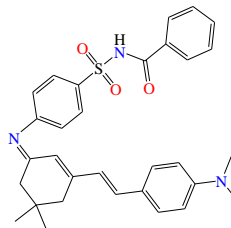

106

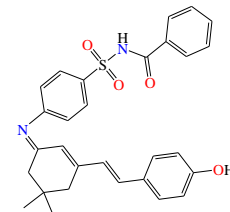

107

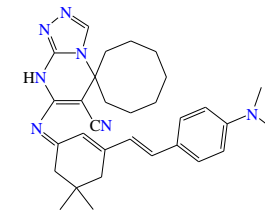

108

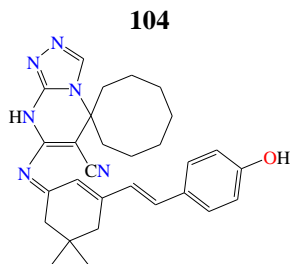

109

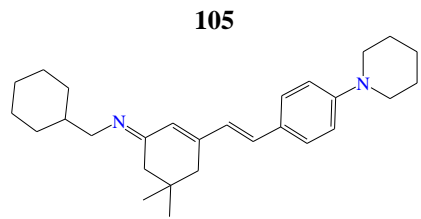

110

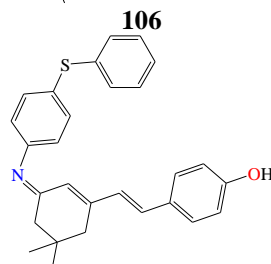

111

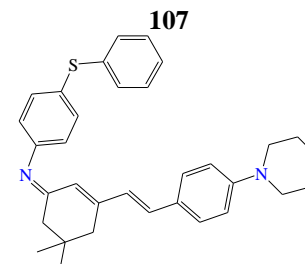

112

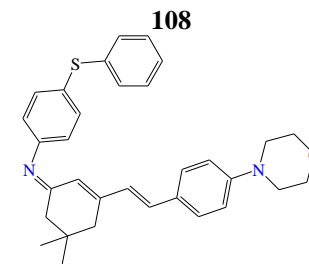

113

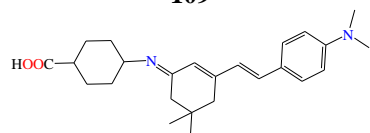

114

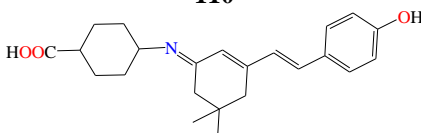

115

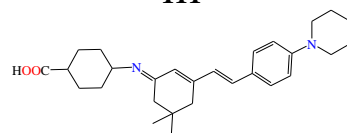

116

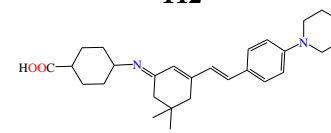

117

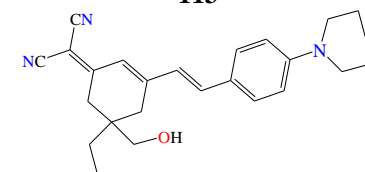

118

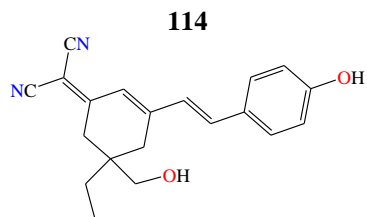

119

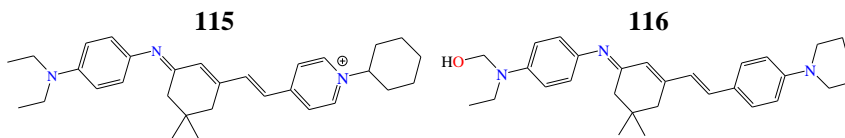

120

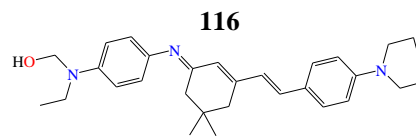

121

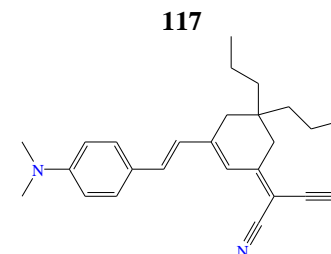

122

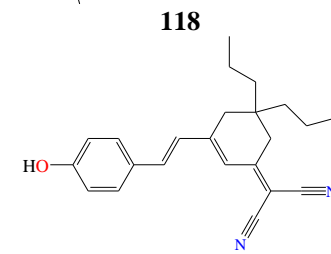

123



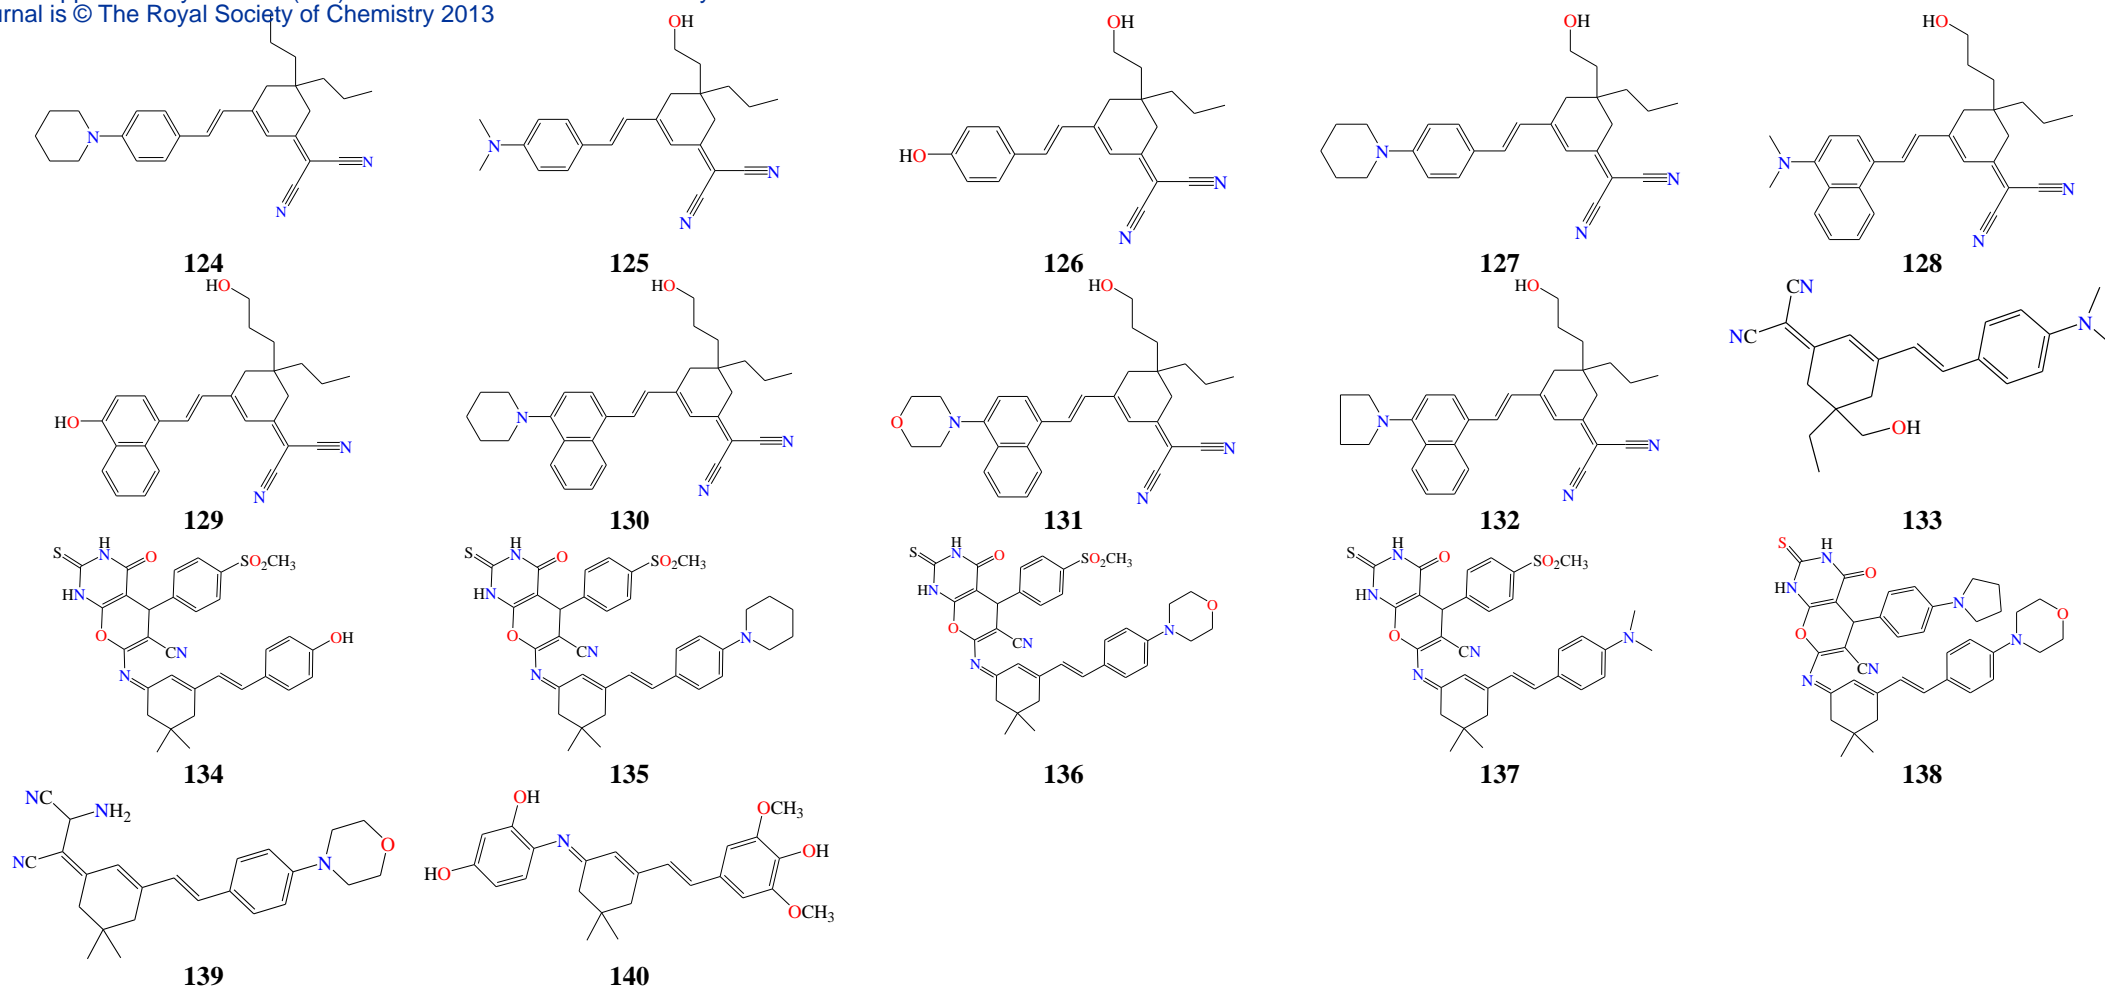

**Scheme S2.** Chemical diagram of the completed list of 74–140 described structural modifications of studied CPLs

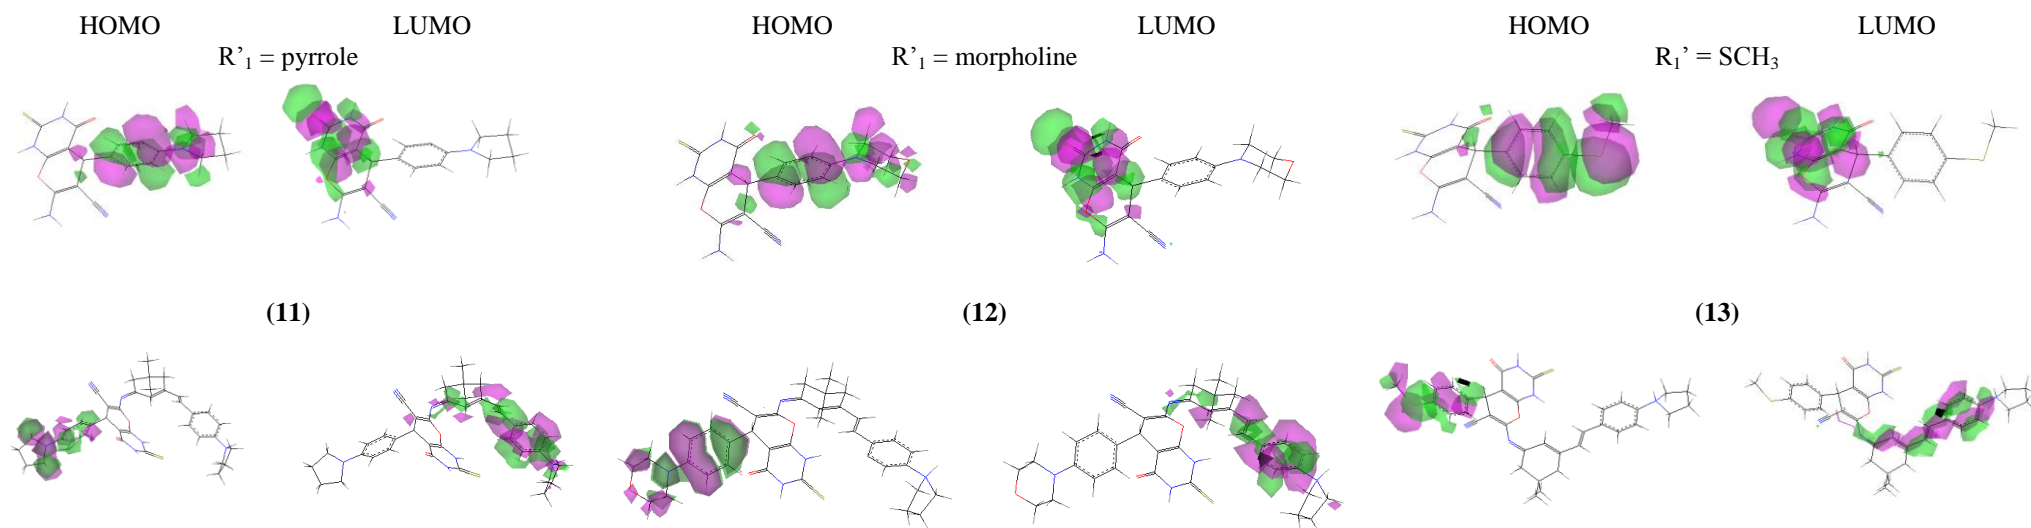

**Scheme S3.** MOs of CLPs **10**, **11** and **19** from subclass **VII** at CAM-B3PW91/6-31+(d,p) level of theory.

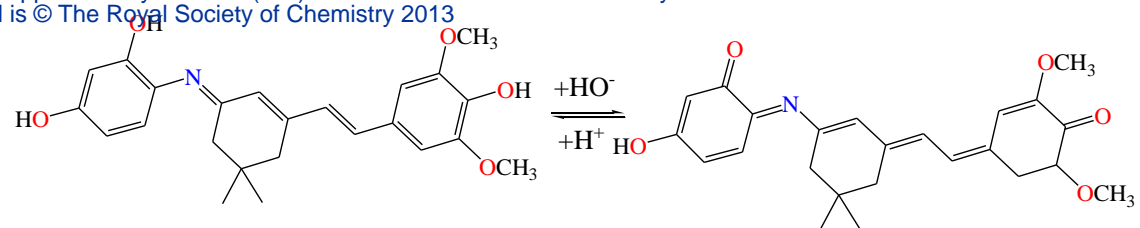

**Scheme S4.** Tautomerism of **140** depending of the pH.



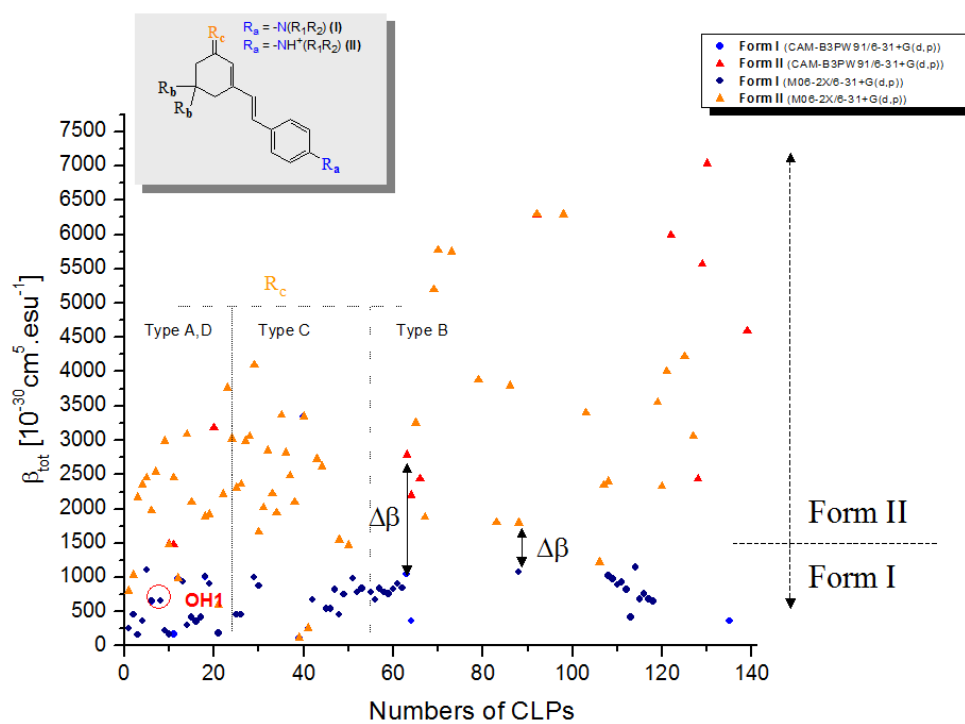

**Figure S1.** First hyperpolarizability tensor matrix components  $\beta_{ijk}$ , ( $10^{-30} \text{ cm}^5 \cdot \text{esu}^{-1}$ )
